# Supplementary material for: Multi-compartment kinetic–allometric (MCKA) model of radionuclide bioaccumulation in marine fish
Source: Copernicus journal article supplement (doi:10.5194/bg-18-2591-2021), 2021-04-25
Supplement: Supplementary file 1 [file bg-18-2591-2021-supplement.pdf]

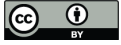

*Supplement of*

## **Multi-compartment kinetic–allometric (MCKA) model of radionuclide bioaccumulation in marine fish**

**Roman Bezhenar et al.**

*Correspondence to:* Vladimir Maderich ([vladmad@gmail.com](mailto:vladmad@gmail.com))

The copyright of individual parts of the supplement might differ from the article licence.

Table S1 Parameters of the MCKA model for fish used to simulate the experiments (Mathews and Fisher, 2008; Mathews et al., 2008) on pulse-like feeding.

| Fish                           | $m$ , kg | $\lambda_2$ , d <sup>-1</sup> | $\lambda_3$ , d <sup>-1</sup> | $\lambda_4$ , d <sup>-1</sup> | $\lambda_5$ , d <sup>-1</sup> |
|--------------------------------|----------|-------------------------------|-------------------------------|-------------------------------|-------------------------------|
| Juvenile <i>Sparus auratus</i> | 0.0001   | 7.5                           | 0.07                          | 0.01                          | 0.275                         |
| <i>Sparus auratus</i>          | 0.012    | 2.3                           | 0.021                         | 0.003                         | 0.083                         |
| <i>Psetta maxima</i>           | 0.027    | 1.85                          | 0.017                         | 0.0025                        | 0.068                         |
| <i>Scyliorhinus canicula</i>   | 0.008    | 2.5                           | 0.023                         | 0.0033                        | 0.092                         |

Table S2. Transfer rate  $k_{2,3}$  (d<sup>-1</sup>) for radionuclides used to simulate the experiments (Mathews and Fisher, 2008; Mathews et al., 2008) on pulse-like feeding.

| Fish                           | <sup>134</sup> Cs | <sup>57</sup> Co and <sup>60</sup> Co | <sup>54</sup> Mn | <sup>65</sup> Zn |
|--------------------------------|-------------------|---------------------------------------|------------------|------------------|
| Juvenile <i>Sparus auratus</i> | 21.45             | 0.127                                 | 1.39             | 1.35             |
| <i>Sparus auratus</i>          | 6.58              | 0.039                                 | 0.425            | 0.414            |
| <i>Psetta maxima</i>           | 5.29              | 0.031                                 | 0.342            | 0.333            |
| <i>Scyliorhinus canicula</i>   | 7.15              | 0.042                                 | 0.462            | 0.45             |

Table S3. Transfer rate  $k_{2,4}$  (d<sup>-1</sup>) for radionuclides used to simulate the experiments (Mathews and Fisher, 2008; Mathews et al., 2008) on pulse-like feeding.

| Fish                           | <sup>134</sup> Cs | <sup>57</sup> Co and <sup>60</sup> Co | <sup>54</sup> Mn | <sup>65</sup> Zn |
|--------------------------------|-------------------|---------------------------------------|------------------|------------------|
| Juvenile <i>Sparus auratus</i> | 0.3               | 0.0069                                | 0.083            | 0.069            |
| <i>Sparus auratus</i>          | 0.092             | 0.0021                                | 0.025            | 0.021            |
| <i>Psetta maxima</i>           | 0.074             | 0.0017                                | 0.02             | 0.017            |
| <i>Scyliorhinus canicula</i>   | 0.1               | 0.0023                                | 0.028            | 0.023            |

Table S4. Transfer rate  $k_{2,5}$  (d<sup>-1</sup>) for radionuclides used to simulate the experiments (Mathews and Fisher, 2008; Mathews et al., 2008) on pulse-like feeding.

| Fish                           | <sup>134</sup> Cs | <sup>57</sup> Co and <sup>60</sup> Co | <sup>54</sup> Mn | <sup>65</sup> Zn |
|--------------------------------|-------------------|---------------------------------------|------------------|------------------|
| Juvenile <i>Sparus auratus</i> | 1.625             | 0.522                                 | 0.774            | 0.715            |
| <i>Sparus auratus</i>          | 0.498             | 0.16                                  | 0.237            | 0.219            |
| <i>Psetta maxima</i>           | 0.401             | 0.129                                 | 0.191            | 0.176            |
| <i>Scyliorhinus canicula</i>   | 0.542             | 0.174                                 | 0.258            | 0.238            |

Table S5. Parameters of MCKA model for fish used to simulate the experiments (Mathews et al., 2008; Jeffree et al., 2006) on uptake of activity from sea water.

| Fish                           | $m$ , kg | $\lambda_1$ , d <sup>-1</sup> | $\lambda_3$ , d <sup>-1</sup> | $\lambda_4$ , d <sup>-1</sup> | $\lambda_5$ , d <sup>-1</sup> |
|--------------------------------|----------|-------------------------------|-------------------------------|-------------------------------|-------------------------------|
| Juvenile <i>Sparus auratus</i> | 0.0002   | 6727                          | 0.058                         | 0.0085                        | 0.231                         |
| <i>Psetta maxima</i>           | 0.0061   | 2862                          | 0.025                         | 0.0036                        | 0.098                         |
| <i>Scyliorhinus canicula</i>   | 0.0067   | 2796                          | 0.024                         | 0.0035                        | 0.096                         |

Table. S6 Transfer rate  $k_{1,3}$  (d<sup>-1</sup>) for radionuclides used to simulate the experiments (Mathews et al., 2008; Jeffree et al., 2006) on uptake of activity from sea water.

| Fish                           | <sup>134</sup> Cs | <sup>57</sup> Co and <sup>60</sup> Co | <sup>54</sup> Mn | <sup>65</sup> Zn |
|--------------------------------|-------------------|---------------------------------------|------------------|------------------|
| Juvenile <i>Sparus auratus</i> | 6.082             | 3.247                                 | 17.789           | 25.914           |
| <i>Psetta maxima</i>           | 2.588             | 1.381                                 | 7.569            | 11.952           |
| <i>Scyliorhinus canicula</i>   | 2.528             | 1.35                                  | 7.394            | 11.675           |

Table. S7 Transfer rate  $k_{1,4}$  (d<sup>-1</sup>) for radionuclides used to simulate the experiments (Mathews et al., 2008; Jeffree et al., 2006) on uptake of activity from sea water.

| Fish                           | <sup>134</sup> Cs | <sup>57</sup> Co and <sup>60</sup> Co | <sup>54</sup> Mn | <sup>65</sup> Zn |
|--------------------------------|-------------------|---------------------------------------|------------------|------------------|
| Juvenile <i>Sparus auratus</i> | 0.0851            | 0.175                                 | 1.064            | 1.33             |
| <i>Psetta maxima</i>           | 0.0362            | 0.074                                 | 0.453            | 0.613            |
| <i>Scyliorhinus canicula</i>   | 0.0353            | 0.072                                 | 0.443            | 0.599            |

Table. S8 Transfer rate  $k_{1,5}$  (d<sup>-1</sup>) for radionuclides used to simulate the experiments (Mathews et al., 2008; Jeffree et al., 2006) on uptake of activity from sea water.

| Fish                           | <sup>134</sup> Cs | <sup>57</sup> Co and <sup>60</sup> Co | <sup>54</sup> Mn | <sup>65</sup> Zn |
|--------------------------------|-------------------|---------------------------------------|------------------|------------------|
| Juvenile <i>Sparus auratus</i> | 0.461             | 13.321                                | 9.933            | 13.73            |
| <i>Psetta maxima</i>           | 0.196             | 5.668                                 | 4.227            | 6.33             |
| <i>Scyliorhinus canicula</i>   | 0.191             | 5.537                                 | 4.129            | 6.186            |

Table S9. Food preference  $P_{ij}$  for predator of type  $i$ , and prey of type  $j$ . (Bezhenar et al., 2016).

| Predator | 2   | 3   | 4   | 6   | 7   | 8   | 9   | 10  | 11   |
|----------|-----|-----|-----|-----|-----|-----|-----|-----|------|
| 0        |     |     |     | 0.5 |     |     | 0.1 |     |      |
| 1        | 1.0 |     |     |     | 0.6 | 0.1 |     |     |      |
| 2        |     | 1.0 |     |     | 0.2 | 0.8 |     |     |      |
| 3        |     |     | 1.0 |     |     |     |     |     | 0.2  |
| 5        |     |     |     | 0.5 | 0.2 | 0.1 |     |     |      |
| 6        |     |     |     |     |     |     | 0.7 | 0.3 | 0.25 |
| 7        |     |     |     |     |     |     | 0.1 | 0.2 | 0.1  |
| 8        |     |     |     |     |     |     | 0.1 | 0.2 | 0.2  |
| 9        |     |     |     |     |     |     |     | 0.3 | 0.25 |

Table S10. Main parameters of boxes around the Forsmark NPP

| Box number    | Volume, km <sup>3</sup> | Depth, m | Area, km <sup>2</sup> | Exchange rate with outer box, km <sup>3</sup> y <sup>-1</sup> |
|---------------|-------------------------|----------|-----------------------|---------------------------------------------------------------|
| 68            | 35.7                    | 32.5     | 1100                  | 3355*                                                         |
| "inner box"   | 3.0                     | 12.5     | 240                   | 140                                                           |
| "coastal box" | 0.076                   | 11.0     | 6.9                   | 30                                                            |

\* total exchange rate with all neighbouring boxes

Table. S11 Parameters of the MCKA model for prey fish (*Clupea harengus membras*) and predator fish (*Esox lucius*, *Hexagrammos otakii*, *Triakis scyllium*, *Squatina japonica*, *Sebastes cheni*, *Lateolabrax japonicus*) in POSEIDON-R model applications.

| fish          | $m$ , kg | $K_f$ , kg/(kg d) | $K_w$ , m <sup>3</sup> /(kg d) | $\lambda_3$ , d <sup>-1</sup> | $\lambda_4$ , d <sup>-1</sup> | $\lambda_5$ , d <sup>-1</sup> |
|---------------|----------|-------------------|--------------------------------|-------------------------------|-------------------------------|-------------------------------|
| Prey fish     | 0.2      | 0.018             | 0.12                           | 0.011                         | 0.0015                        | 0.041                         |
| Predator fish | 4        | 0.0085            | 0.057                          | 0.005                         | 0.0007                        | 0.019                         |

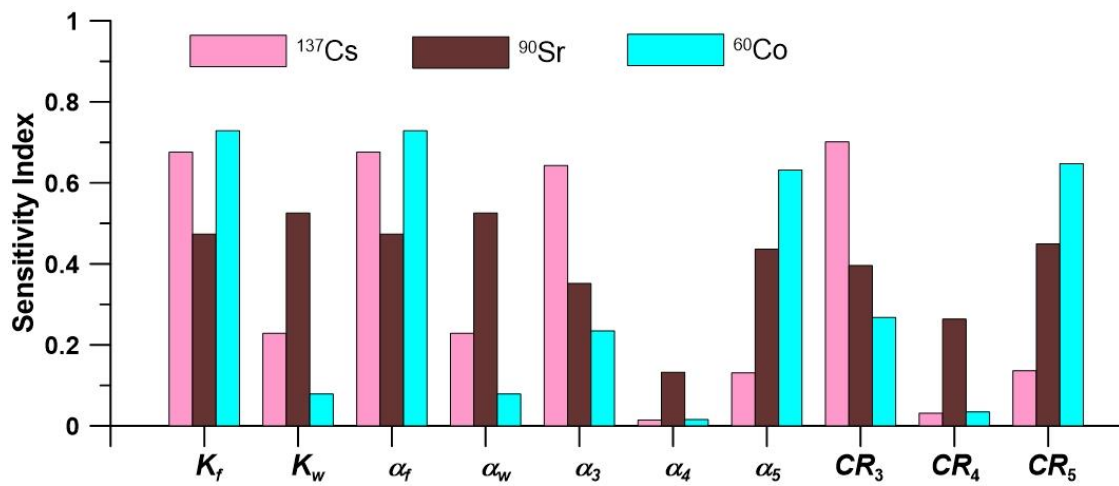

**Fig.S1.** Dependence of sensitivity index on model parameters for <sup>137</sup>Cs, <sup>90</sup>Sr and <sup>60</sup>Co.

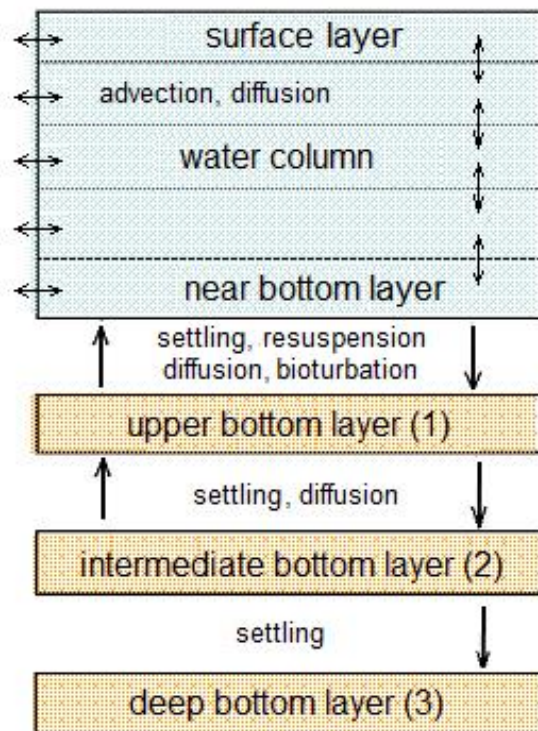

**Fig.S2.** Vertical structure and radionuclide transfer processes in the compartment model POSEIDON-R.

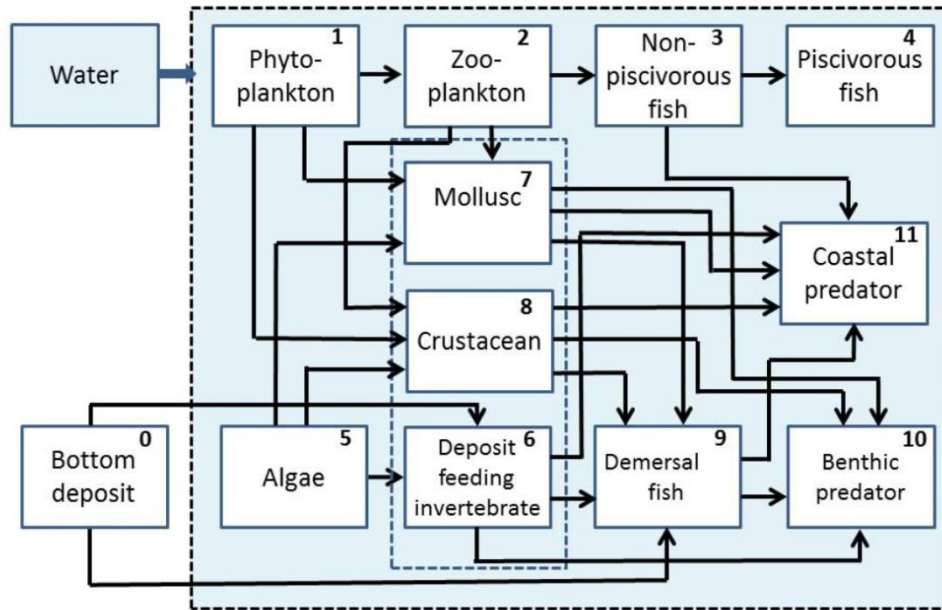

**Fig. S3.** Radionuclide transfer from the water and bottom sediment boxes to marine organisms (Bezhenar et al., 2016). The radionuclide transfers among marine food web compartments are given for 11 types of marine organisms.
